# Supplementary material for: Association of circulating PLA2G7 levels with cancer cachexia and assessment of darapladib as a therapy
Source: PubMed Central journal article supplement (PMC8517355; doi:10.1002/jcsm.12758), 2021-08-23
Supplement: JCSM-12-1333-s003.pdf [file JCSM-12-1333-s003.pdf]

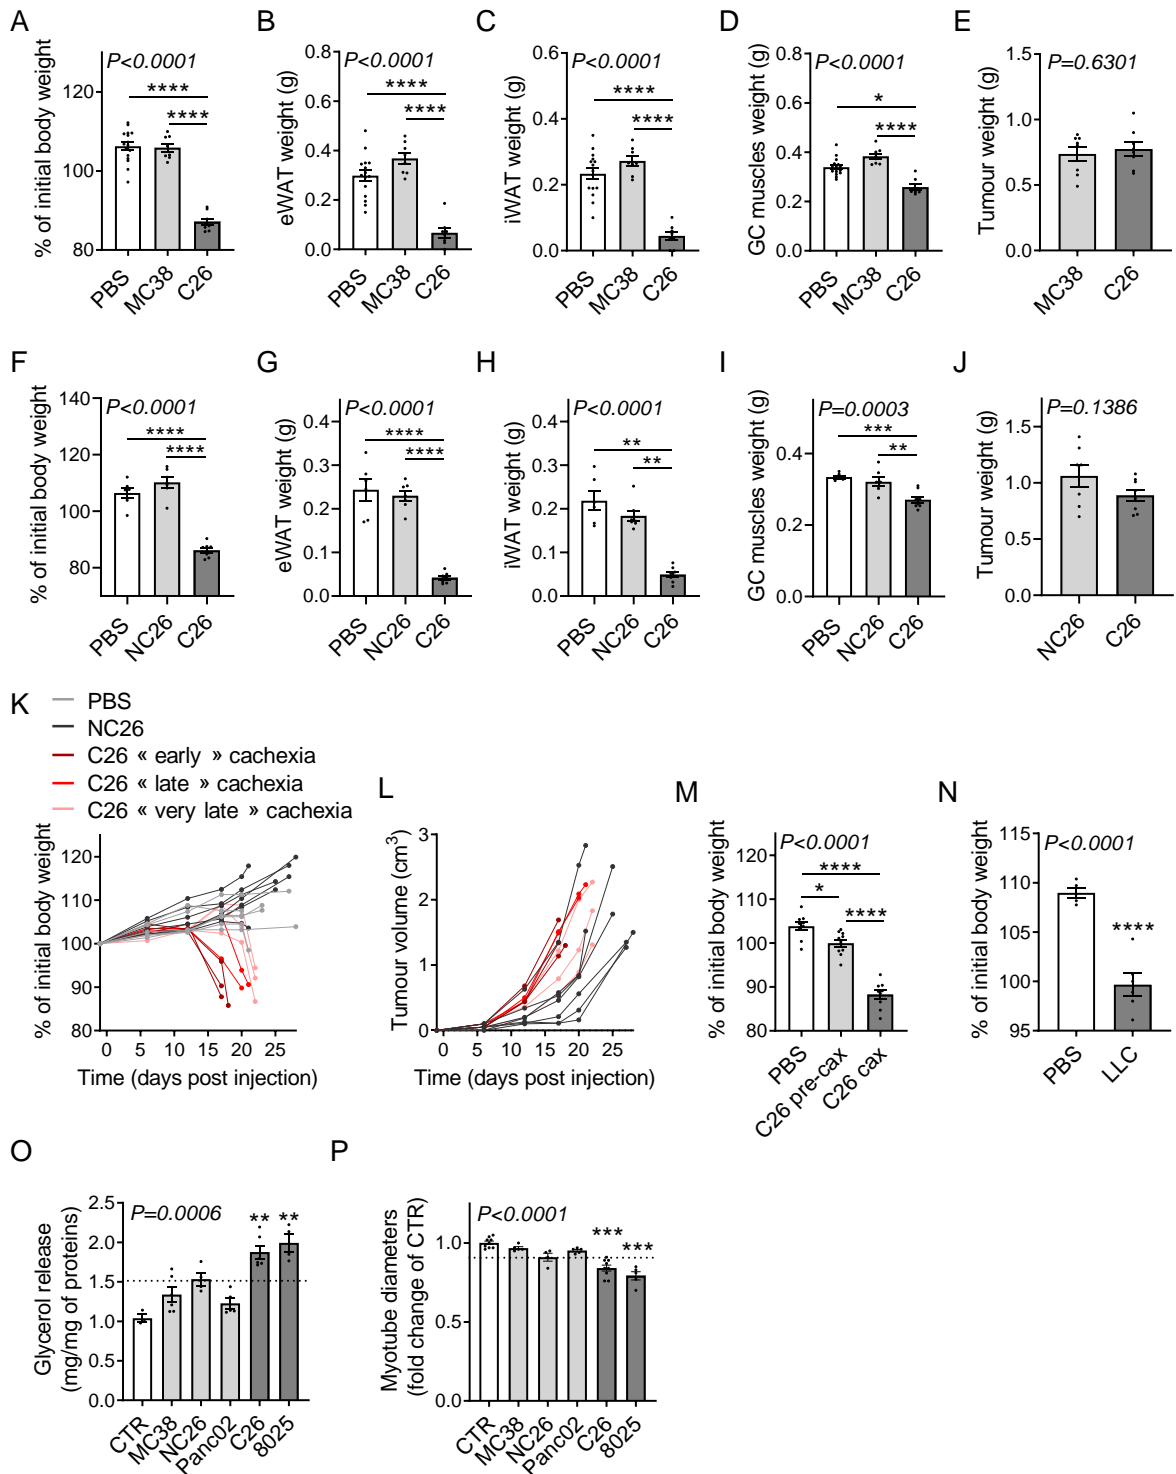

Figure S1

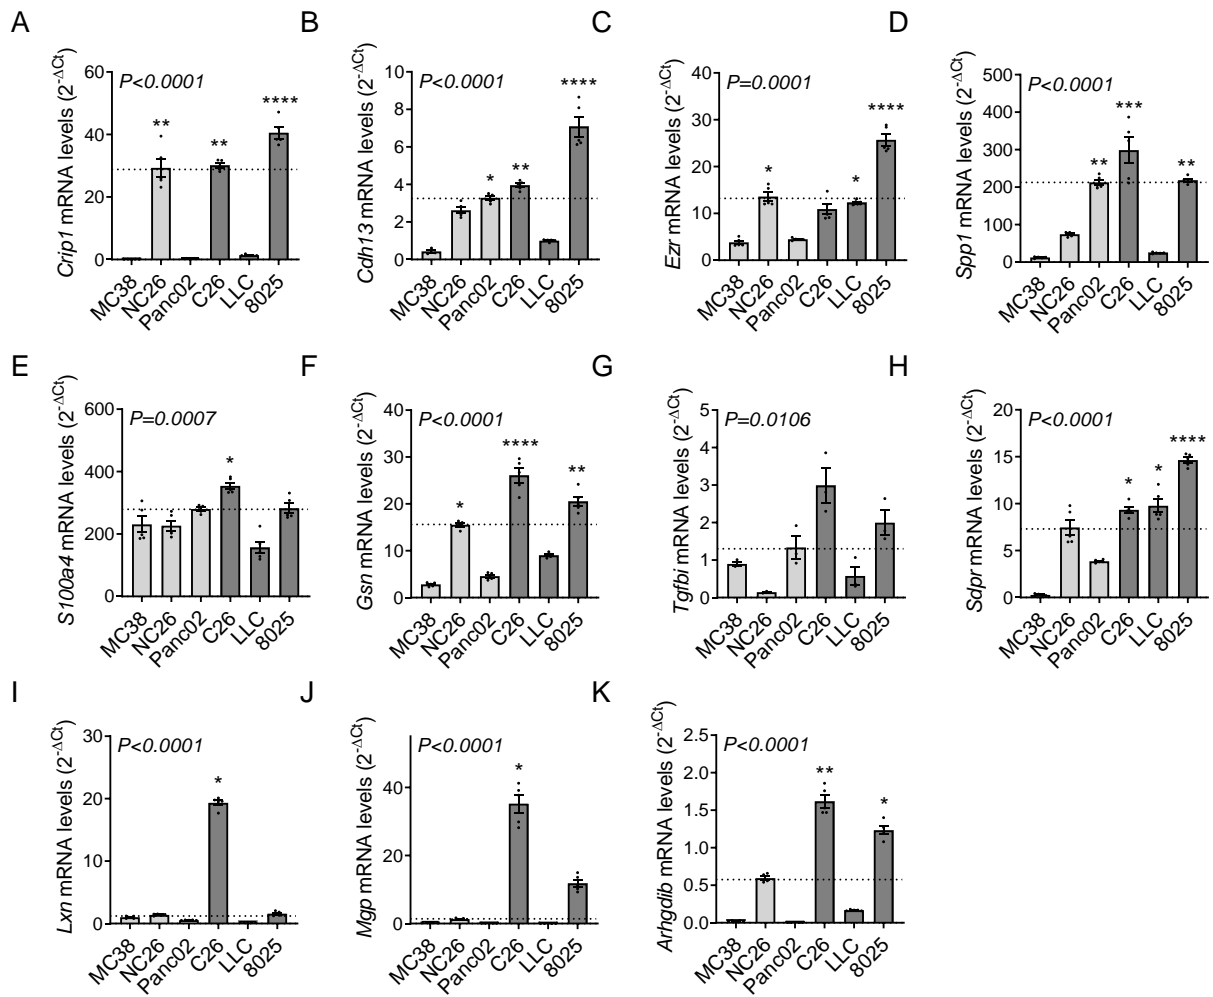

Figure S2

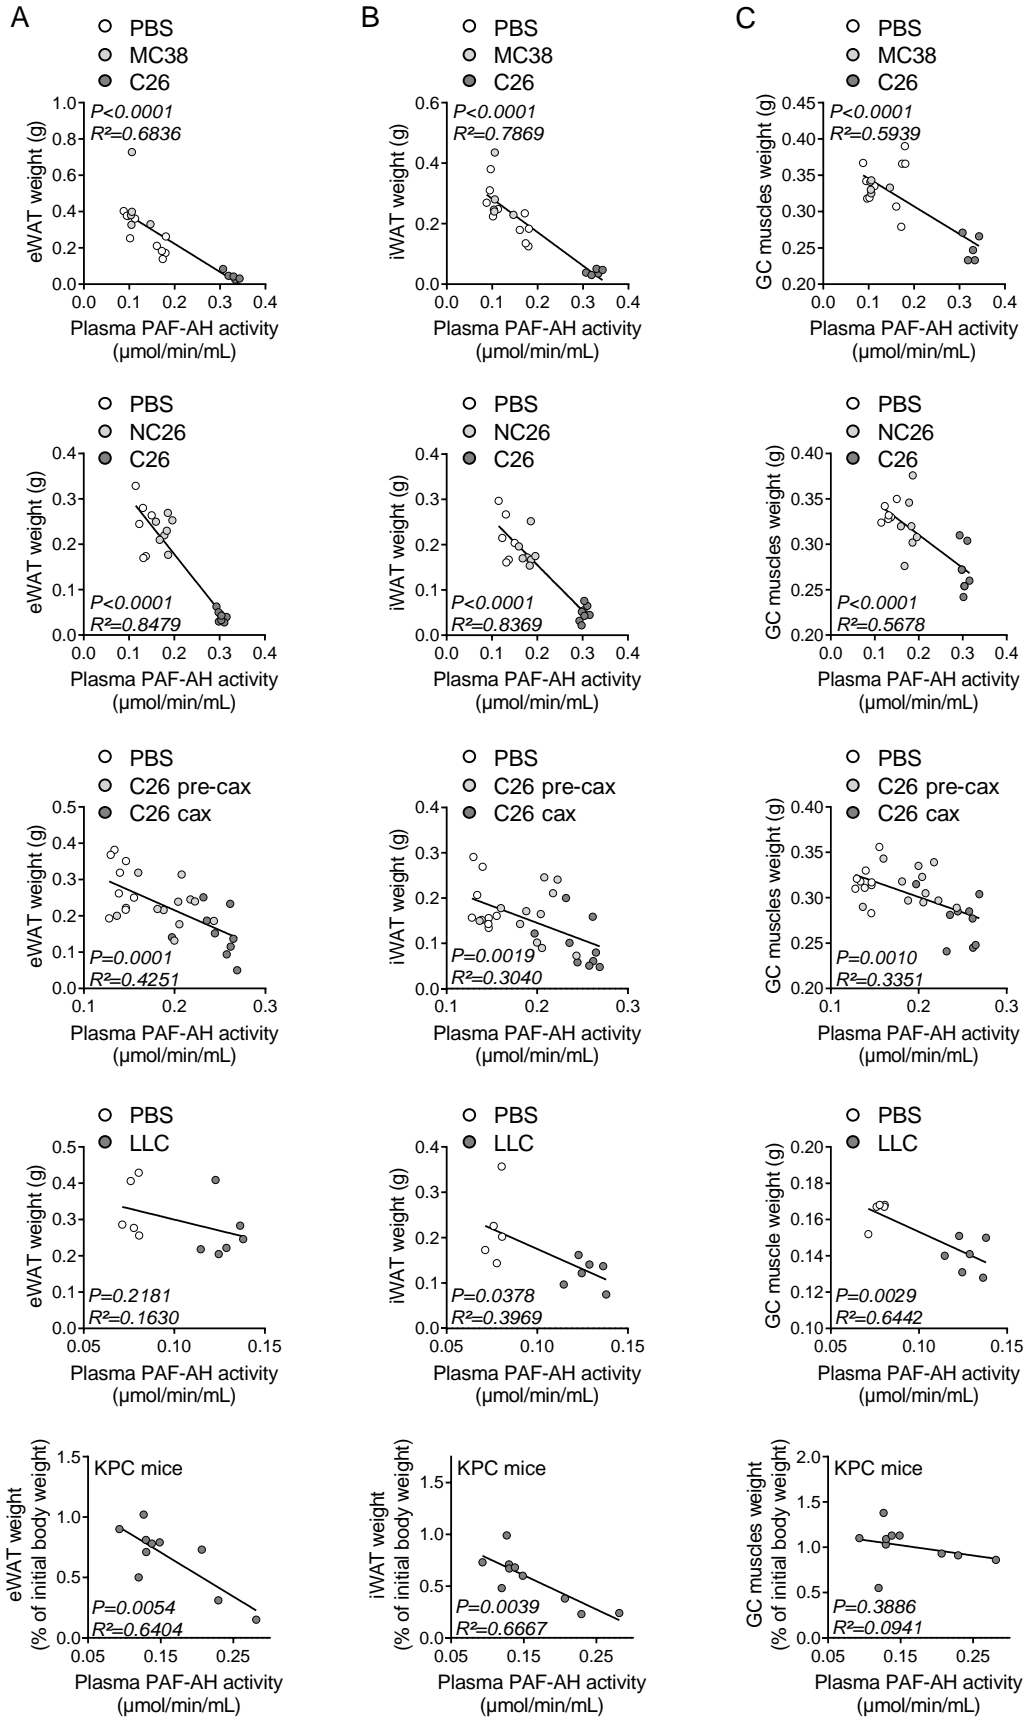

Figure S3

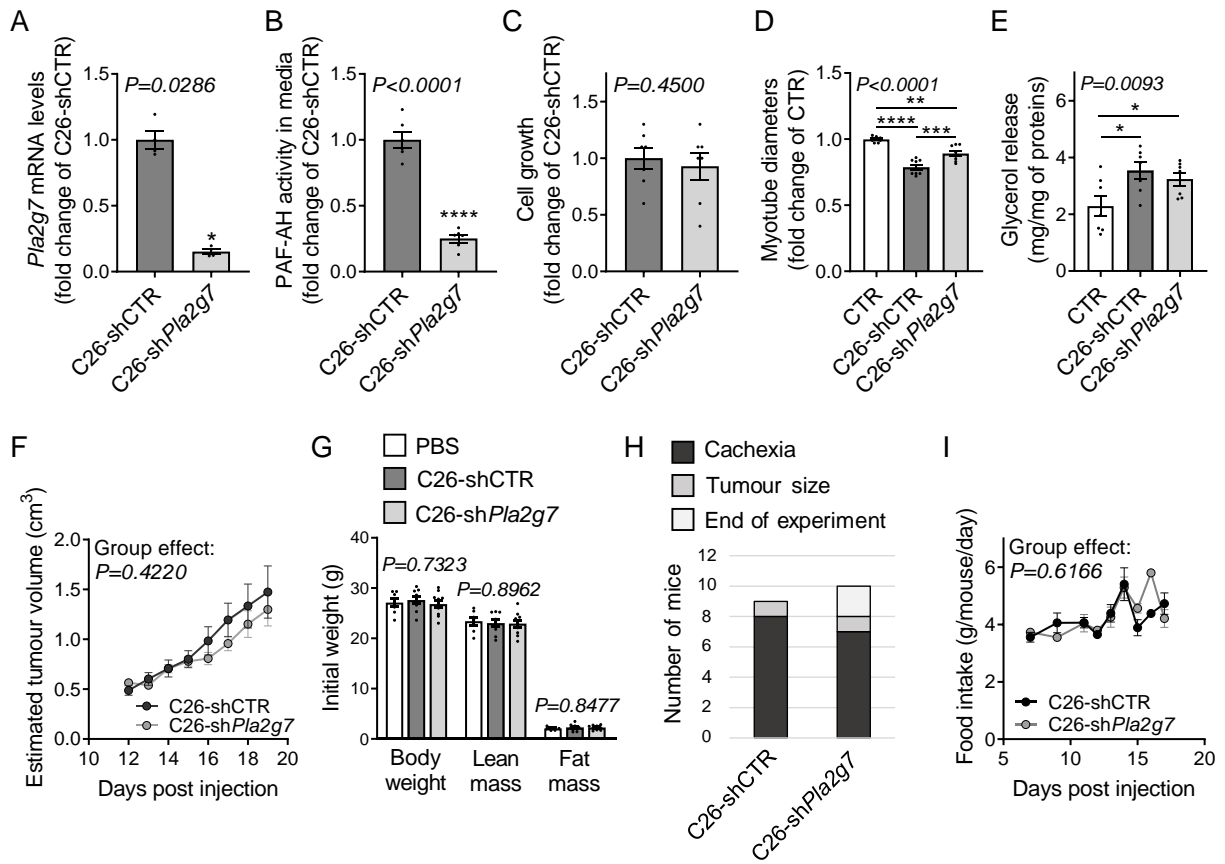

Figure S4

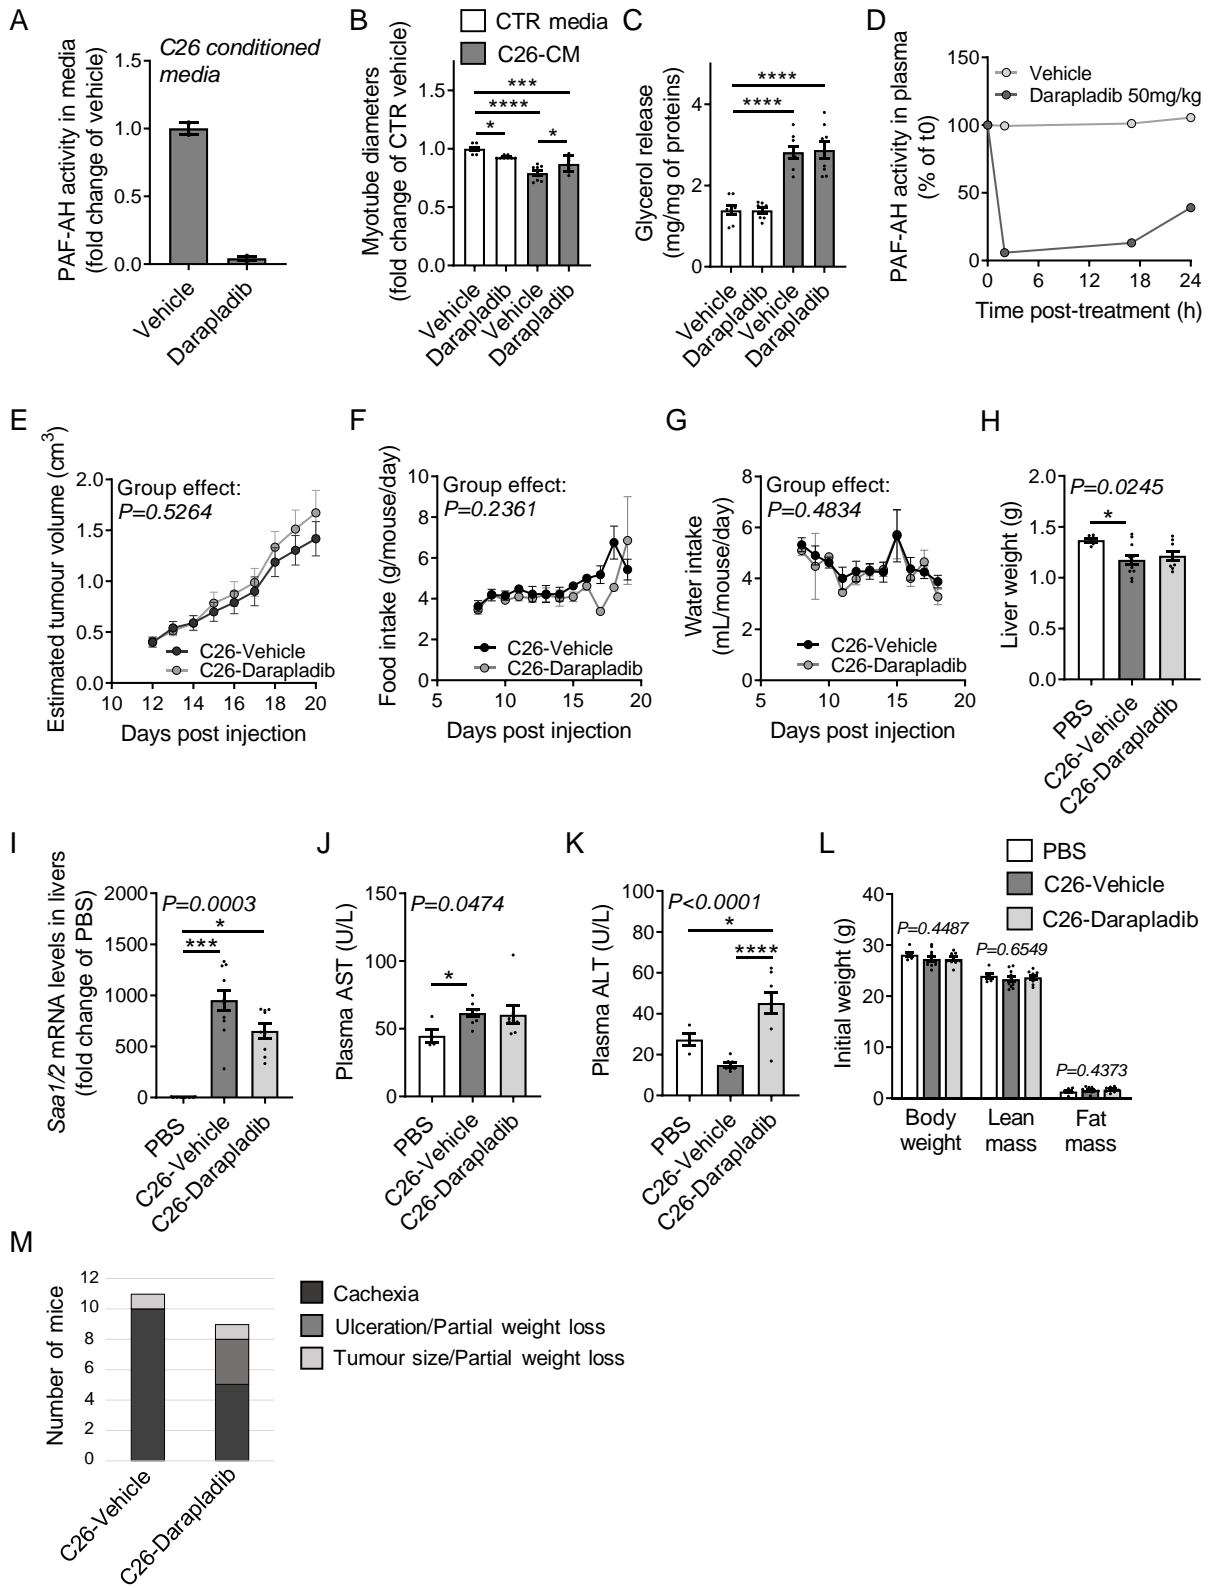

Figure S5

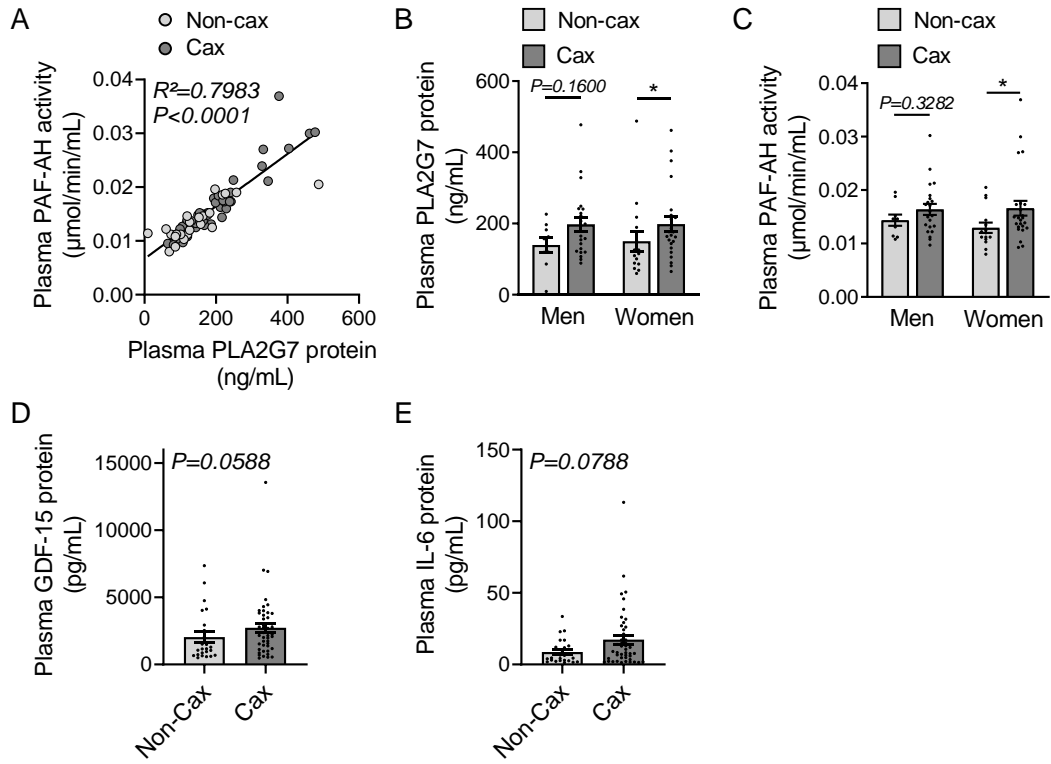

Figure S6
